# Supplementary material for: Individualized intervention for frail non-dialysis elderly patients with chronic kidney disease: protocol for a randomized controlled trial
Source: Springer Nature journal article supplement (doi:10.1186/s12877-020-1491-6), 2020-05-04

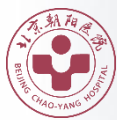

# 饮食日记

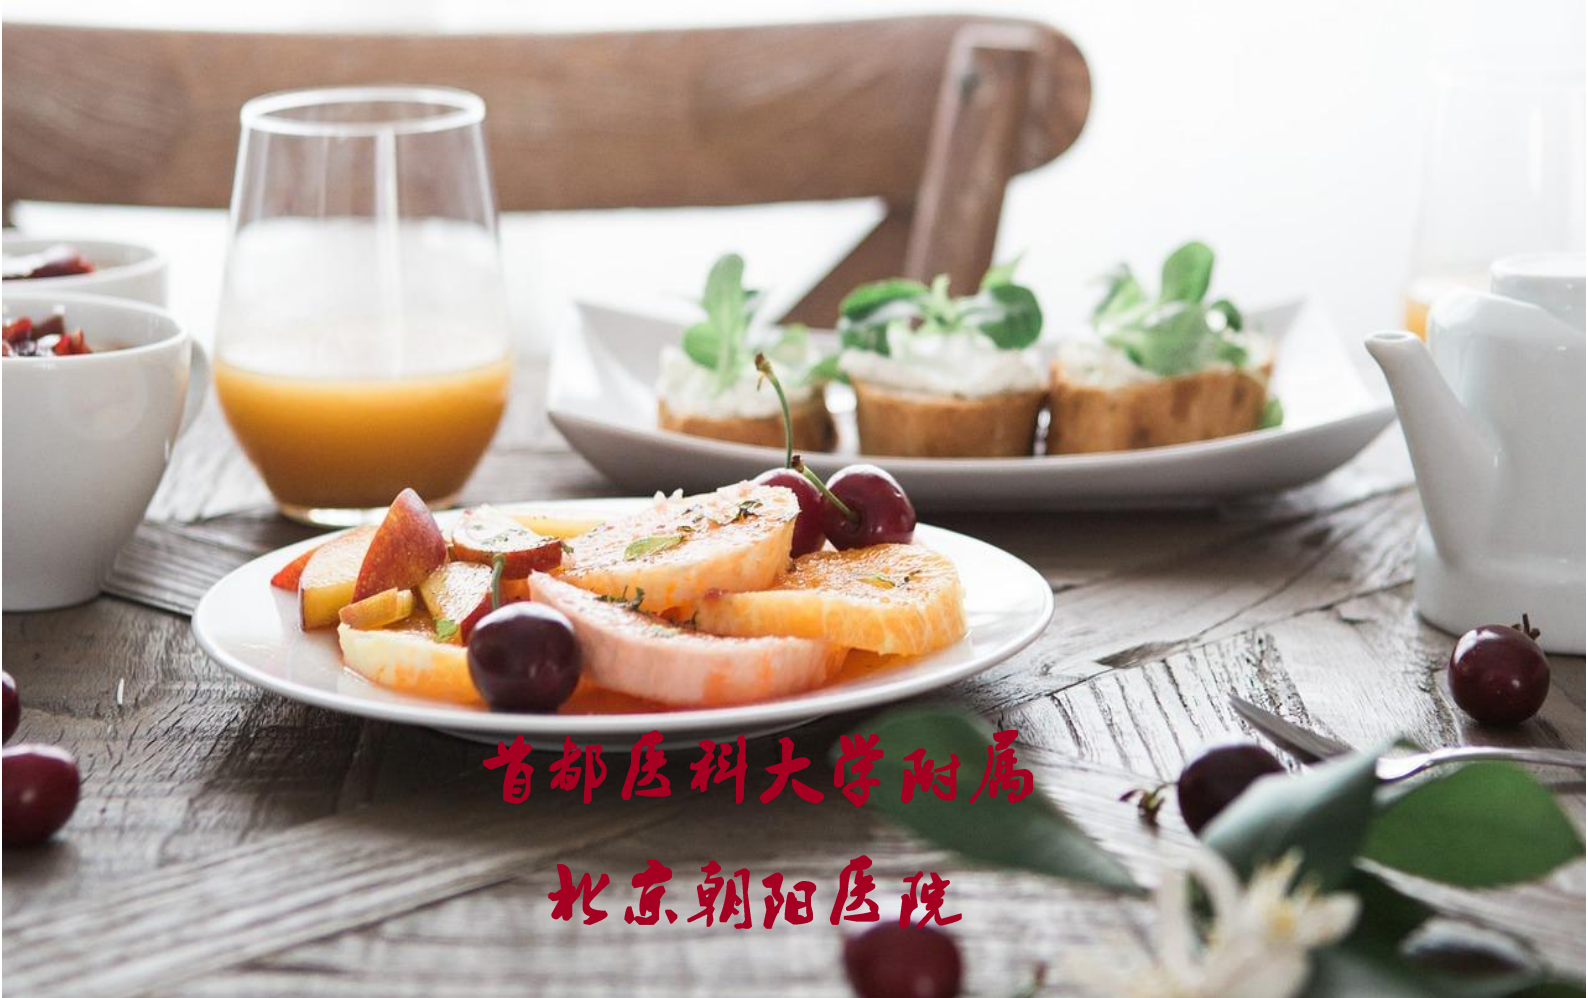

首都医科大学附属

北京朝阳医院

## 序 言

伴随人口老龄化的快速进展老年人群快速增长,同时老年人群存在异质性特点,人们越来越关注老年人的衰弱问题。衰弱,常常给老年人带来不良的临床预后,如住院、病死率增高等。在大多数老年衰弱患者中,存在营养状况不佳和营养需求变化。因此,营养支持及日常健康饮食对衰弱患者非常重要。

这个《饮食日记》是一本简单而有效的手册,用于帮助您掌握自己的日常饮食。您可以记录您的日常饮食,这将对您日常饮食中摄入的热量及蛋白质有直观的认识。在这个手册的后面部分,附上了关于常见食物的热量(卡路里)及蛋白质含量对照表,可以作为日常饮食的参考。

这本手册使用起来很方便,只需要您记录下来日期及您进食的食物,包括食物名称及量,进而可参照后边的食物附录,换算出您摄入的卡路里及蛋白质含量。

如果您有任何问题,可与我们专业的工作人员联系:010-85231436。

孙倩美

首都医科大学附属北京朝阳医院综合科

2017年9月

姓名\_\_\_\_\_

日期\_\_\_\_\_

|      | 食物 | 总量<br>(g) | 可食用部分<br>(g) | 卡路里<br>(kcal) | 蛋白质<br>(g) |
|------|----|-----------|--------------|---------------|------------|
| 早餐   |    |           |              |               |            |
| 加餐 1 |    |           |              |               |            |
| 午餐   |    |           |              |               |            |
| 加餐 2 |    |           |              |               |            |
| 晚餐   |    |           |              |               |            |
| 加餐 3 |    |           |              |               |            |
| 合计   | -  |           | -            |               |            |

姓名\_\_\_\_\_

日期\_\_\_\_\_

|      | 食物 | 总量<br>(g) | 可食用部分<br>(g) | 卡路里<br>(kcal) | 蛋白质<br>(g) |
|------|----|-----------|--------------|---------------|------------|
| 早餐   |    |           |              |               |            |
| 加餐 1 |    |           |              |               |            |
| 午餐   |    |           |              |               |            |
| 加餐 2 |    |           |              |               |            |
| 晚餐   |    |           |              |               |            |
| 加餐 3 |    |           |              |               |            |
| 合计   | -  |           | -            |               |            |

姓名\_\_\_\_\_

日期\_\_\_\_\_

|      | 食物 | 总量<br>(g) | 可食用部分<br>(g) | 卡路里<br>(kcal) | 蛋白质<br>(g) |
|------|----|-----------|--------------|---------------|------------|
| 早餐   |    |           |              |               |            |
| 加餐 1 |    |           |              |               |            |
| 午餐   |    |           |              |               |            |
| 加餐 2 |    |           |              |               |            |
| 晚餐   |    |           |              |               |            |
| 加餐 3 |    |           |              |               |            |
| 合计   | -  |           | -            |               |            |

姓名\_\_\_\_\_

日期\_\_\_\_\_

|      | 食物 | 总量<br>(g) | 可食用部分<br>(g) | 卡路里<br>(kcal) | 蛋白质<br>(g) |
|------|----|-----------|--------------|---------------|------------|
| 早餐   |    |           |              |               |            |
| 加餐 1 |    |           |              |               |            |
| 午餐   |    |           |              |               |            |
| 加餐 2 |    |           |              |               |            |
| 晚餐   |    |           |              |               |            |
| 加餐 3 |    |           |              |               |            |
| 合计   | -  |           | -            |               |            |

姓名\_\_\_\_\_

日期\_\_\_\_\_

|      | 食物 | 总量<br>(g) | 可食用部分<br>(g) | 卡路里<br>(kcal) | 蛋白质<br>(g) |
|------|----|-----------|--------------|---------------|------------|
| 早餐   |    |           |              |               |            |
| 加餐 1 |    |           |              |               |            |
| 午餐   |    |           |              |               |            |
| 加餐 2 |    |           |              |               |            |
| 晚餐   |    |           |              |               |            |
| 加餐 3 |    |           |              |               |            |
| 合计   | -  |           | -            |               |            |

姓名\_\_\_\_\_

日期\_\_\_\_\_

|      | 食物 | 总量<br>(g) | 可食用部分<br>(g) | 卡路里<br>(kcal) | 蛋白质<br>(g) |
|------|----|-----------|--------------|---------------|------------|
| 早餐   |    |           |              |               |            |
| 加餐 1 |    |           |              |               |            |
| 午餐   |    |           |              |               |            |
| 加餐 2 |    |           |              |               |            |
| 晚餐   |    |           |              |               |            |
| 加餐 3 |    |           |              |               |            |
| 合计   | -  |           | -            |               |            |



姓名\_\_\_\_\_

日期\_\_\_\_\_

|      | 食物 | 总量<br>(g) | 可食用部分<br>(g) | 卡路里<br>(kcal) | 蛋白质<br>(g) |
|------|----|-----------|--------------|---------------|------------|
| 早餐   |    |           |              |               |            |
| 加餐 1 |    |           |              |               |            |
| 午餐   |    |           |              |               |            |
| 加餐 2 |    |           |              |               |            |
| 晚餐   |    |           |              |               |            |
| 加餐 3 |    |           |              |               |            |
| 合计   | -  |           | -            |               |            |

姓名\_\_\_\_\_

日期\_\_\_\_\_

|      | 食物 | 总量<br>(g) | 可食用部分<br>(g) | 卡路里<br>(kcal) | 蛋白质<br>(g) |
|------|----|-----------|--------------|---------------|------------|
| 早餐   |    |           |              |               |            |
| 加餐 1 |    |           |              |               |            |
| 午餐   |    |           |              |               |            |
| 加餐 2 |    |           |              |               |            |
| 晚餐   |    |           |              |               |            |
| 加餐 3 |    |           |              |               |            |
| 合计   | -  |           | -            |               |            |

姓名\_\_\_\_\_

日期\_\_\_\_\_

|      | 食物 | 总量<br>(g) | 可食用部分<br>(g) | 卡路里<br>(kcal) | 蛋白质<br>(g) |
|------|----|-----------|--------------|---------------|------------|
| 早餐   |    |           |              |               |            |
| 加餐 1 |    |           |              |               |            |
| 午餐   |    |           |              |               |            |
| 加餐 2 |    |           |              |               |            |
| 晚餐   |    |           |              |               |            |
| 加餐 3 |    |           |              |               |            |
| 合计   | -  |           | -            |               |            |

姓名\_\_\_\_\_

日期\_\_\_\_\_

|      | 食物 | 总量<br>(g) | 可食用部分<br>(g) | 卡路里<br>(kcal) | 蛋白质<br>(g) |
|------|----|-----------|--------------|---------------|------------|
| 早餐   |    |           |              |               |            |
| 加餐 1 |    |           |              |               |            |
| 午餐   |    |           |              |               |            |
| 加餐 2 |    |           |              |               |            |
| 晚餐   |    |           |              |               |            |
| 加餐 3 |    |           |              |               |            |
| 合计   | -  |           | -            |               |            |

姓名\_\_\_\_\_

日期\_\_\_\_\_

|      | 食物 | 总量<br>(g) | 可食用部分<br>(g) | 卡路里<br>(kcal) | 蛋白质<br>(g) |
|------|----|-----------|--------------|---------------|------------|
| 早餐   |    |           |              |               |            |
| 加餐 1 |    |           |              |               |            |
| 午餐   |    |           |              |               |            |
| 加餐 2 |    |           |              |               |            |
| 晚餐   |    |           |              |               |            |
| 加餐 3 |    |           |              |               |            |
| 合计   | -  |           | -            |               |            |

姓名\_\_\_\_\_

日期\_\_\_\_\_

|      | 食物 | 总量<br>(g) | 可食用部分<br>(g) | 卡路里<br>(kcal) | 蛋白质<br>(g) |
|------|----|-----------|--------------|---------------|------------|
| 早餐   |    |           |              |               |            |
| 加餐 1 |    |           |              |               |            |
| 午餐   |    |           |              |               |            |
| 加餐 2 |    |           |              |               |            |
| 晚餐   |    |           |              |               |            |
| 加餐 3 |    |           |              |               |            |
| 合计   | -  |           | -            |               |            |

姓名\_\_\_\_\_

日期\_\_\_\_\_

|      | 食物 | 总量<br>(g) | 可食用部分<br>(g) | 卡路里<br>(kcal) | 蛋白质<br>(g) |
|------|----|-----------|--------------|---------------|------------|
| 早餐   |    |           |              |               |            |
| 加餐 1 |    |           |              |               |            |
| 午餐   |    |           |              |               |            |
| 加餐 2 |    |           |              |               |            |
| 晚餐   |    |           |              |               |            |
| 加餐 3 |    |           |              |               |            |
| 合计   | -  |           | -            |               |            |

姓名\_\_\_\_\_

日期\_\_\_\_\_

|      | 食物 | 总量<br>(g) | 可食用部分<br>(g) | 卡路里<br>(kcal) | 蛋白质<br>(g) |
|------|----|-----------|--------------|---------------|------------|
| 早餐   |    |           |              |               |            |
| 加餐 1 |    |           |              |               |            |
| 午餐   |    |           |              |               |            |
| 加餐 2 |    |           |              |               |            |
| 晚餐   |    |           |              |               |            |
| 加餐 3 |    |           |              |               |            |
| 合计   | -  |           | -            |               |            |



姓名\_\_\_\_\_

日期\_\_\_\_\_

|      | 食物 | 总量<br>(g) | 可食用部分<br>(g) | 卡路里<br>(kcal) | 蛋白质<br>(g) |
|------|----|-----------|--------------|---------------|------------|
| 早餐   |    |           |              |               |            |
| 加餐 1 |    |           |              |               |            |
| 午餐   |    |           |              |               |            |
| 加餐 2 |    |           |              |               |            |
| 晚餐   |    |           |              |               |            |
| 加餐 3 |    |           |              |               |            |
| 合计   | -  |           | -            |               |            |

姓名\_\_\_\_\_

日期\_\_\_\_\_

|      | 食物 | 总量<br>(g) | 可食用部分<br>(g) | 卡路里<br>(kcal) | 蛋白质<br>(g) |
|------|----|-----------|--------------|---------------|------------|
| 早餐   |    |           |              |               |            |
| 加餐 1 |    |           |              |               |            |
| 午餐   |    |           |              |               |            |
| 加餐 2 |    |           |              |               |            |
| 晚餐   |    |           |              |               |            |
| 加餐 3 |    |           |              |               |            |
| 合计   | -  |           | -            |               |            |

姓名\_\_\_\_\_

日期\_\_\_\_\_

|      | 食物 | 总量<br>(g) | 可食用部分<br>(g) | 卡路里<br>(kcal) | 蛋白质<br>(g) |
|------|----|-----------|--------------|---------------|------------|
| 早餐   |    |           |              |               |            |
| 加餐 1 |    |           |              |               |            |
| 午餐   |    |           |              |               |            |
| 加餐 2 |    |           |              |               |            |
| 晚餐   |    |           |              |               |            |
| 加餐 3 |    |           |              |               |            |
| 合计   | -  |           | -            |               |            |

姓名\_\_\_\_\_

日期\_\_\_\_\_

|      | 食物 | 总量<br>(g) | 可食用部分<br>(g) | 卡路里<br>(kcal) | 蛋白质<br>(g) |
|------|----|-----------|--------------|---------------|------------|
| 早餐   |    |           |              |               |            |
| 加餐 1 |    |           |              |               |            |
| 午餐   |    |           |              |               |            |
| 加餐 2 |    |           |              |               |            |
| 晚餐   |    |           |              |               |            |
| 加餐 3 |    |           |              |               |            |
| 合计   | -  |           | -            |               |            |

姓名\_\_\_\_\_

日期\_\_\_\_\_

|      | 食物 | 总量<br>(g) | 可食用部分<br>(g) | 卡路里<br>(kcal) | 蛋白质<br>(g) |
|------|----|-----------|--------------|---------------|------------|
| 早餐   |    |           |              |               |            |
| 加餐 1 |    |           |              |               |            |
| 午餐   |    |           |              |               |            |
| 加餐 2 |    |           |              |               |            |
| 晚餐   |    |           |              |               |            |
| 加餐 3 |    |           |              |               |            |
| 合计   | -  |           | -            |               |            |

姓名\_\_\_\_\_

日期\_\_\_\_\_

|      | 食物 | 总量<br>(g) | 可食用部分<br>(g) | 卡路里<br>(kcal) | 蛋白质<br>(g) |
|------|----|-----------|--------------|---------------|------------|
| 早餐   |    |           |              |               |            |
| 加餐 1 |    |           |              |               |            |
| 午餐   |    |           |              |               |            |
| 加餐 2 |    |           |              |               |            |
| 晚餐   |    |           |              |               |            |
| 加餐 3 |    |           |              |               |            |
| 合计   | -  |           | -            |               |            |

姓名\_\_\_\_\_

日期\_\_\_\_\_

|      | 食物 | 总量<br>(g) | 可食用部分<br>(g) | 卡路里<br>(kcal) | 蛋白质<br>(g) |
|------|----|-----------|--------------|---------------|------------|
| 早餐   |    |           |              |               |            |
| 加餐 1 |    |           |              |               |            |
| 午餐   |    |           |              |               |            |
| 加餐 2 |    |           |              |               |            |
| 晚餐   |    |           |              |               |            |
| 加餐 3 |    |           |              |               |            |
| 合计   | -  |           | -            |               |            |

姓名\_\_\_\_\_

日期\_\_\_\_\_

|      | 食物 | 总量<br>(g) | 可食用部分<br>(g) | 卡路里<br>(kcal) | 蛋白质<br>(g) |
|------|----|-----------|--------------|---------------|------------|
| 早餐   |    |           |              |               |            |
| 加餐 1 |    |           |              |               |            |
| 午餐   |    |           |              |               |            |
| 加餐 2 |    |           |              |               |            |
| 晚餐   |    |           |              |               |            |
| 加餐 3 |    |           |              |               |            |
| 合计   | -  |           | -            |               |            |



姓名\_\_\_\_\_

日期\_\_\_\_\_

|      | 食物 | 总量<br>(g) | 可食用部分<br>(g) | 卡路里<br>(kcal) | 蛋白质<br>(g) |
|------|----|-----------|--------------|---------------|------------|
| 早餐   |    |           |              |               |            |
| 加餐 1 |    |           |              |               |            |
| 午餐   |    |           |              |               |            |
| 加餐 2 |    |           |              |               |            |
| 晚餐   |    |           |              |               |            |
| 加餐 3 |    |           |              |               |            |
| 合计   | -  |           | -            |               |            |

姓名\_\_\_\_\_

日期\_\_\_\_\_

|      | 食物 | 总量<br>(g) | 可食用部分<br>(g) | 卡路里<br>(kcal) | 蛋白质<br>(g) |
|------|----|-----------|--------------|---------------|------------|
| 早餐   |    |           |              |               |            |
| 加餐 1 |    |           |              |               |            |
| 午餐   |    |           |              |               |            |
| 加餐 2 |    |           |              |               |            |
| 晚餐   |    |           |              |               |            |
| 加餐 3 |    |           |              |               |            |
| 合计   | -  |           | -            |               |            |

姓名\_\_\_\_\_

日期\_\_\_\_\_

|      | 食物 | 总量<br>(g) | 可食用部分<br>(g) | 卡路里<br>(kcal) | 蛋白质<br>(g) |
|------|----|-----------|--------------|---------------|------------|
| 早餐   |    |           |              |               |            |
| 加餐 1 |    |           |              |               |            |
| 午餐   |    |           |              |               |            |
| 加餐 2 |    |           |              |               |            |
| 晚餐   |    |           |              |               |            |
| 加餐 3 |    |           |              |               |            |
| 合计   | -  |           | -            |               |            |

姓名\_\_\_\_\_

日期\_\_\_\_\_

|      | 食物 | 总量<br>(g) | 可食用部分<br>(g) | 卡路里<br>(kcal) | 蛋白质<br>(g) |
|------|----|-----------|--------------|---------------|------------|
| 早餐   |    |           |              |               |            |
| 加餐 1 |    |           |              |               |            |
| 午餐   |    |           |              |               |            |
| 加餐 2 |    |           |              |               |            |
| 晚餐   |    |           |              |               |            |
| 加餐 3 |    |           |              |               |            |
| 合计   | -  |           | -            |               |            |

姓名\_\_\_\_\_

日期\_\_\_\_\_

|      | 食物 | 总量<br>(g) | 可食用部分<br>(g) | 卡路里<br>(kcal) | 蛋白质<br>(g) |
|------|----|-----------|--------------|---------------|------------|
| 早餐   |    |           |              |               |            |
| 加餐 1 |    |           |              |               |            |
| 午餐   |    |           |              |               |            |
| 加餐 2 |    |           |              |               |            |
| 晚餐   |    |           |              |               |            |
| 加餐 3 |    |           |              |               |            |
| 合计   | -  |           | -            |               |            |

姓名\_\_\_\_\_

日期\_\_\_\_\_

|      | 食物 | 总量<br>(g) | 可食用部分<br>(g) | 卡路里<br>(kcal) | 蛋白质<br>(g) |
|------|----|-----------|--------------|---------------|------------|
| 早餐   |    |           |              |               |            |
| 加餐 1 |    |           |              |               |            |
| 午餐   |    |           |              |               |            |
| 加餐 2 |    |           |              |               |            |
| 晚餐   |    |           |              |               |            |
| 加餐 3 |    |           |              |               |            |
| 合计   | -  |           | -            |               |            |

姓名\_\_\_\_\_

日期\_\_\_\_\_

|      | 食物 | 总量<br>(g) | 可食用部分<br>(g) | 卡路里<br>(kcal) | 蛋白质<br>(g) |
|------|----|-----------|--------------|---------------|------------|
| 早餐   |    |           |              |               |            |
| 加餐 1 |    |           |              |               |            |
| 午餐   |    |           |              |               |            |
| 加餐 2 |    |           |              |               |            |
| 晚餐   |    |           |              |               |            |
| 加餐 3 |    |           |              |               |            |
| 合计   | -  |           | -            |               |            |

姓名\_\_\_\_\_

日期\_\_\_\_\_

|      | 食物 | 总量<br>(g) | 可食用部分<br>(g) | 卡路里<br>(kcal) | 蛋白质<br>(g) |
|------|----|-----------|--------------|---------------|------------|
| 早餐   |    |           |              |               |            |
| 加餐 1 |    |           |              |               |            |
| 午餐   |    |           |              |               |            |
| 加餐 2 |    |           |              |               |            |
| 晚餐   |    |           |              |               |            |
| 加餐 3 |    |           |              |               |            |
| 合计   | -  |           | -            |               |            |



## 常见食物附录

| 食物名称 | 食物总量<br>(g) | 可食用部分<br>(g) | 卡路里<br>(kcal) | 蛋白质<br>(g) | 脂肪<br>(g) | 膳食纤维<br>(g) | 碳水化合物<br>(g) |
|------|-------------|--------------|---------------|------------|-----------|-------------|--------------|
| 稻米   | 100         | 100          | 345           | 7.7        | 0.6       | 0.6         | 77.4         |
| 糯米   | 100         | 100          | 344           | 7.9        | 0.8       | 0.7         | 76.7         |
| 小麦   | 100         | 100          | 339           | 11.9       | -         | 10.8        | 75.2         |
| 小麦粉  | 100         | 100          | 349           | 11.2       | 1.5       | 2.1         | 73.6         |
| 挂面   | 100         | 100          | 348           | 10.1       | 0.7       | 1.6         | 76.0         |
| 荞麦   | 100         | 100          | 337           | 9.3        | 2.3       | 6.5         | 73.0         |
| 大麦   | 100         | 100          | 327           | 10.2       | 1.4       | 9.9         | 73.3         |
| 小米   | 100         | 100          | 361           | 9.0        | 3.1       | 1.6         | 75.1         |
| 玉米   | 100         | 100          | 348           | 8.7        | 3.8       | 6.4         | 73.0         |
| 玉米面  | 100         | 100          | 352           | 8.1        | 3.3       | 5.6         | 75.2         |
| 燕麦片  | 100         | 100          | 367           | 15.0       | 6.7       | 5.3         | 61.6         |
| 方便面  | 100         | 100          | 472           | 9.5        | 21.1      | 0.7         | 60.9         |
| 面包   | 100         | 100          | 313           | 8.3        | 5.1       | 0.5         | 58.6         |
| 红薯   | 100         | 100          | 61            | 0.7        | 0.2       | 0.6         | 15.3         |
| 土豆   | 100         | 100          | 81            | 2.6        | 0.2       | 1.1         | 17.8         |
| 包子   | 100         | 100          | 227           | 7.3        | 10.0      | 1.70        | 30.3         |
| 饺子   | 100         | 100          | 218           | 7.5        | 10.8      | 3.2         | 26.0         |
| 年糕   | 100         | 100          | 156           | 3.3        | 0.6       | 0.8         | 34.7         |
| 炒饭   | 100         | 100          | 188           | 5.0        | 5.6       | 2.0         | 31.7         |
| 牛奶   | 100         | 100          | 54            | 3.0        | 3.2       | -           | 3.4          |
| 酸奶   | 100         | 100          | 72            | 2.5        | 2.7       | -           | 9.3          |
| 三明治  | 100         | 100          | 244           | 14.2       | 10.6      | 1.0         | 22.9         |
| 奶粉   | 100         | 100          | 478           | 20.1       | 21.2      | -           | 51.7         |
| 奶酪   | 100         | 100          | 328           | 25.7       | 23.5      | -           | 3.5          |
| 卷心菜  | 100         | 82           | 26            | 2.1        | 0.2       | 1.2         | 4.6          |
| 大白菜  | 100         | 83           | 17            | 1.4        | 0.1       | 0.9         | 3.0          |
| 油菜绿菜 | 100         | 87           | 25            | 1.8        | 0.5       | 1.1         | 3.8          |
| 芹菜   | 100         | 66           | 17            | 0.8        | 0.1       | 1.4         | 3.9          |
| 韭菜   | 100         | 90           | 29            | 2.4        | 0.4       | 1.4         | 4.6          |
| 芦笋   | 100         | 90           | 22            | 1.4        | 0.1       | 1.9         | 4.9          |

| 食物名称  | 食物总量<br>(g) | 可食用部分<br>(g) | 卡路里<br>(kcal) | 蛋白质<br>(g) | 脂肪<br>(g) | 膳食纤维<br>(g) | 碳水化合物<br>(g) |
|-------|-------------|--------------|---------------|------------|-----------|-------------|--------------|
| 莴苣    | 100         | 62           | 15            | 1.0        | 0.1       | 0.6         | 2.8          |
| 大蒜    | 100         | 85           | 128           | 4.5        | 0.2       | 1.1         | 27.6         |
| 茭白    | 100         | 76           | 26            | 1.2        | 0.2       | 1.9         | 5.9          |
| 胡萝卜   | 100         | 96           | 39            | 1.0        | 0.2       | 1.1         | 8.8          |
| 荸荠    | 100         | 78           | 61            | 1.2        | 0.2       | 1.1         | 14.2         |
| 姜     | 100         | 95           | 46            | 1.3        | 0.6       | 2.7         | 10.3         |
| 萝卜    | 100         | 95           | 23            | 0.9        | 0.1       | 1.0         | 5.0          |
| 马铃薯   | 100         | 94           | 77            | 2.0        | 0.2       | 0.7         | 17.2         |
| 藕     | 100         | 88           | 73            | 1.9        | 0.2       | 1.2         | 1.0          |
| 苹果    | 100         | 76           | 54            | 0.2        | 0.2       | 1.2         | 13.5         |
| 葡萄    | 100         | 86           | 44            | 0.5        | 0.2       | 0.4         | 10.3         |
| 香蕉    | 100         | 59           | 93            | 1.4        | 0.2       | 1.2         | 22.0         |
| 草莓    | 100         | 97           | 32            | 1.0        | 0.2       | 1.1         | 7.1          |
| 桂圆    | 100         | 50           | 71            | 1.2        | 0.1       | 0.4         | 16.6         |
| 红果    | 100         | 100          | 251           | 4.3        | 2.2       | 49.7        | 78.4         |
| 梨     | 100         | 82           | 45            | 0.2        | 0.2       | 1.1         | 11.1         |
| 枇杷    | 100         | 62           | 41            | 0.8        | 0.2       | 0.8         | 9.3          |
| 菠萝    | 100         | 68           | 44            | 0.5        | 0.1       | 1.3         | 10.8         |
| 鲜枣    | 100         | 87           | 125           | 0.3        | 1.1       | 1.9         | 30.5         |
| 柿     | 100         | 87           | 74            | 0.4        | 0.1       | 1.4         | 18.5         |
| 桃     | 100         | 86           | 51            | 0.9        | 0.1       | 1.3         | 12.2         |
| 杏     | 100         | 91           | 38            | 0.9        | 0.1       | 1.3         | 9.1          |
| 橘     | 100         | 76           | 45            | 0.8        | 0.4       | 1.4         | 10.3         |
| 猪肉(瘦) | 100         | 100          | 143           | 20.3       | 6.2       | -           | 1.5          |
| 羊肉(瘦) | 100         | 90           | 118           | 20.5       | 3.9       | -           | 0.2          |
| 牛肉(瘦) | 100         | 100          | 106           | 20.2       | 2.3       | -           | 1.2          |
| 酱牛肉   | 100         | 100          | 246           | 31.4       | 11.9      | -           | 3.2          |
| 鸡     | 100         | 66           | 167           | 19.3       | 9.4       | -           | 1.3          |
| 鹅     | 100         | 63           | 251           | 17.9       | 19.9      | -           | -            |
| 鸽     | 100         | 42           | 201           | 16.5       | 14.2      | -           | 1.7          |
| 鸭     | 100         | 68           | 240           | 15.5       | 19.7      | -           | 0.2          |
| 北京烤鸭  | 100         | 80           | 436           | 16.6       | 38.4      | -           | 6.0          |
| 大黄鱼   | 100         | 66           | 97            | 17.7       | 2.5       | -           | 0.8          |
| 小黄鱼   | 100         | 63           | 99            | 17.9       | 3.0       | -           | 0.1          |
| 带鱼    | 100         | 76           | 127           | 17.7       | 4.9       | -           | 3.1          |
| 鲢鱼    | 100         | 61           | 104           | 17.8       | 3.6       | -           | -            |
| 鲤鱼    | 100         | 54           | 109           | 17.6       | 4.1       | -           | 0.5          |

| 食物名称 | 食物总量<br>(g) | 可食用部分<br>(g) | 卡路里<br>(kcal) | 蛋白质<br>(g) | 脂肪<br>(g) | 膳食纤维<br>(g) | 碳水化合物<br>(g) |
|------|-------------|--------------|---------------|------------|-----------|-------------|--------------|
| 鳊鱼   | 100         | 67           | 89            | 18.0       | 1.4       | -           | 1.2          |
| 草鱼   | 100         | 58           | 113           | 16.6       | 5.2       | -           | -            |
| 泥鳅   | 100         | 60           | 96            | 17.9       | 2.0       | -           | 1.7          |
| 墨鱼   | 100         | 69           | 83            | 15.2       | 0.9       | -           | 3.4          |
| 对虾   | 100         | 61           | 93            | 18.6       | 0.8       | -           | 2.8          |
| 河虾   | 100         | 86           | 87            | 16.4       | 2.4       | -           | -            |
| 螃蟹   | 100         | 42           | 103           | 17.5       | 2.6       | -           | 2.3          |
| 鸡蛋   | 100         | 88           | 156           | 12.8       | 11.1      | -           | 1.3          |
| 鸭蛋   | 100         | 87           | 180           | 12.6       | 13.0      | -           | 3.1          |
| 鹅蛋   | 100         | 87           | 196           | 11.1       | 15.6      | -           | 2.8          |
| 鹌鹑蛋  | 100         | 86           | 160           | 12.8       | 11.1      | -           | 2.1          |
| 核桃   | 100         | 43           | 646           | 14.9       | 58.8      | 9.5         | 19.1         |
| 花生   | 100         | 100          | 574           | 24.8       | 44.3      | 5.5         | 21.7         |
| 莲子   | 100         | 100          | 350           | 17.2       | 2.0       | 3.0         | 67.2         |
| 山核桃  | 100         | 24           | 616           | 18.0       | 50.4      | 7.4         | 26.2         |
| 西瓜子  | 100         | 43           | 582           | 32.7       | 44.8      | 4.5         | 14.2         |

## 参考文献:

1. 季兰芳, 等. 营养与膳食[M]. 第三版. 北京: 人民卫生出版社, 2014.
2. 焦广宇, 等. 临床营养学[M]. 第三版. 北京: 人民卫生出版社, 2010.

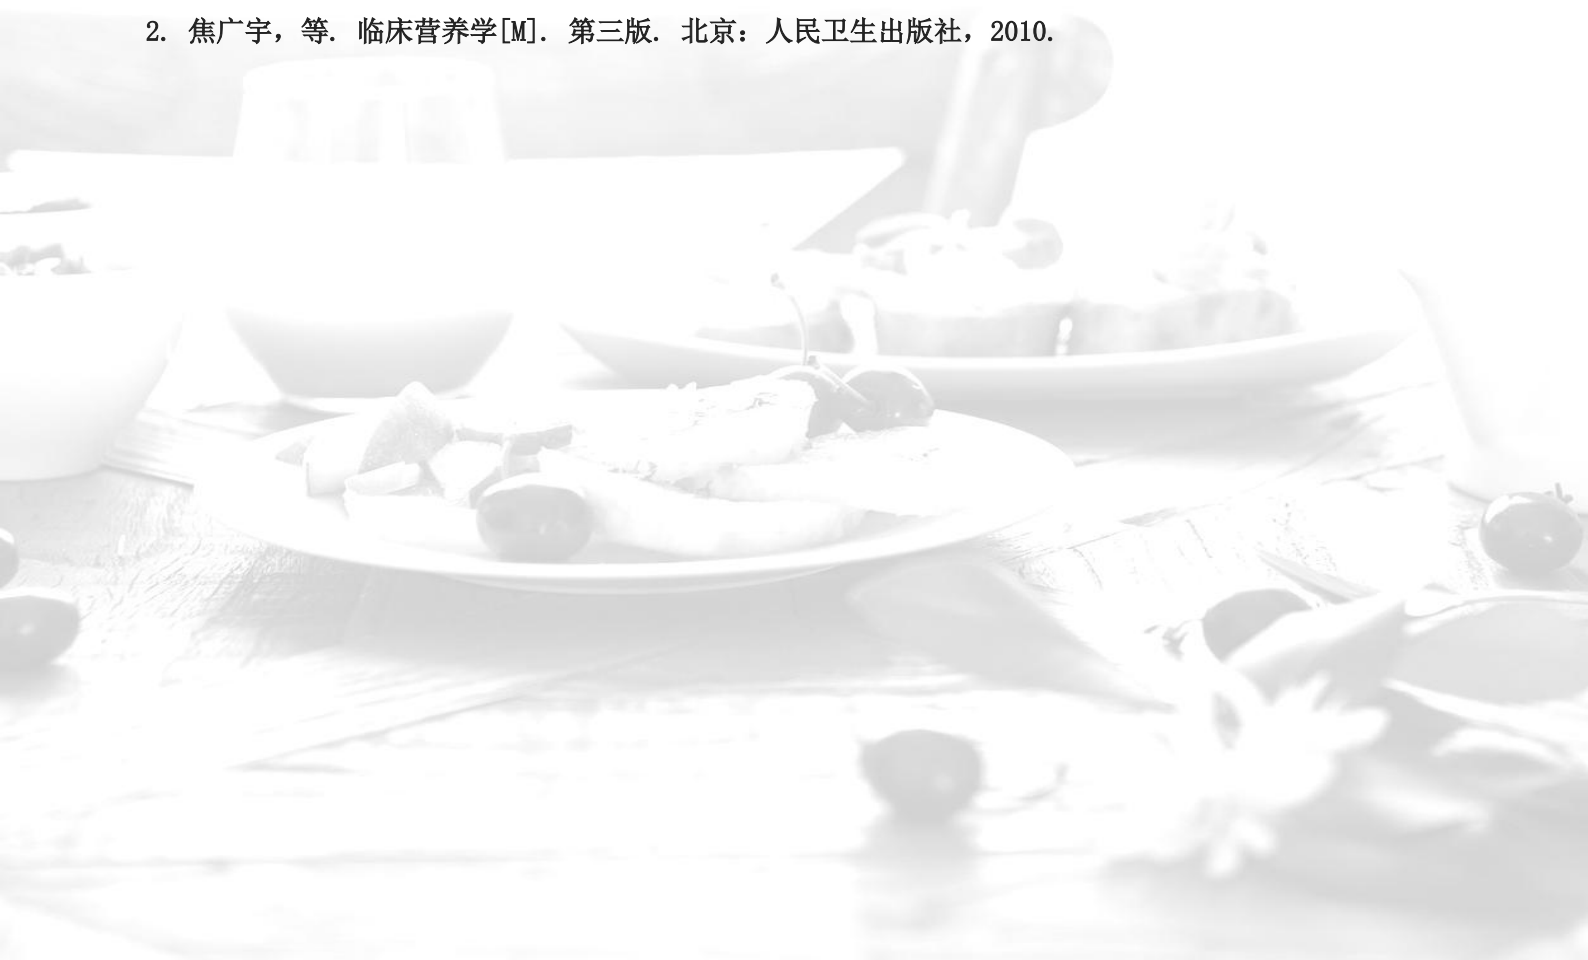

Supplement: MOESM1 [file 17952856]
