# Supplementary material for: Individualized intervention for frail non-dialysis elderly patients with chronic kidney disease: protocol for a randomized controlled trial
Source: Springer Nature journal article supplement (doi:10.1186/s12877-020-1491-6), 2020-05-04

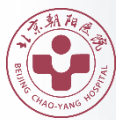

# DIET DIARY

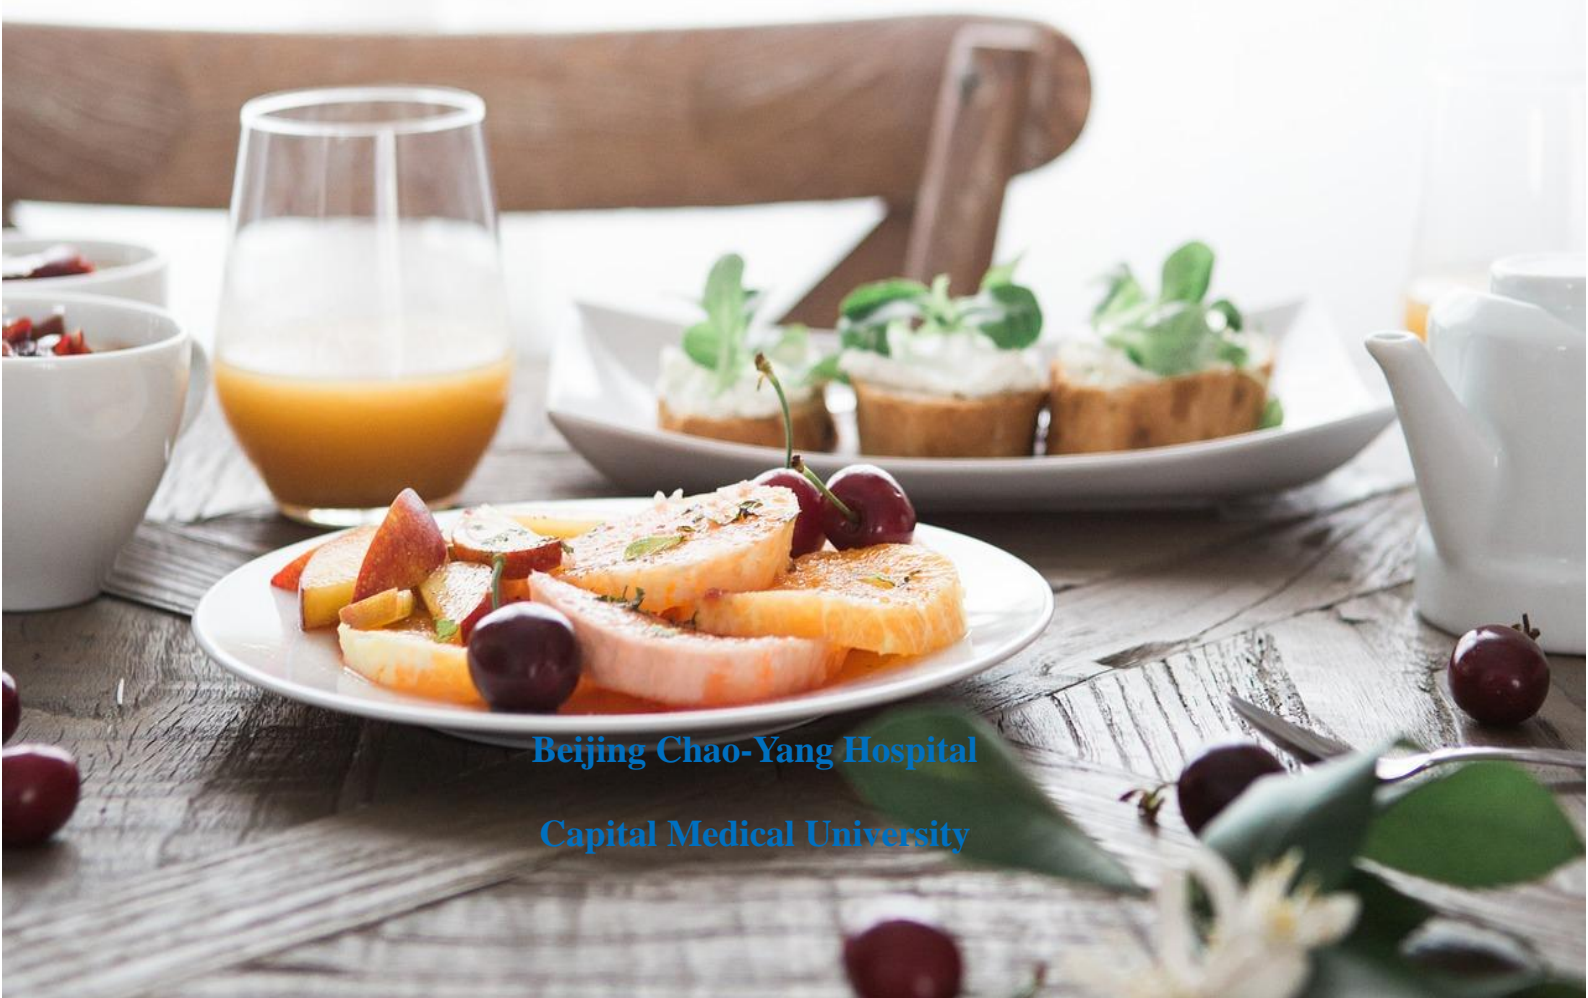

Beijing Chao-Yang Hospital

Capital Medical University

## INTRODUCTION

The accelerated speed of aging and the heterogeneity of elderly have led to an increasing focus on the frailty. And, frailty is consistently believed to be associated with hospitalization, mortality, and other poor outcomes. In most of frail patients, nutrition worsened and nutritional requirements are altered. So, nutrition support and rational diet are very important for frail patients.

This diet diary is a simple but helpful manual which can help you manage your diet. You can record your daily diet and gain a straightforward impression of how calories and proteins you get in your day. In the last part of the handbook, we provide an appendix for calories and proteins of common foods for reference.

The way of using the booklet is easy, which only needs you to put down the date and the food you eat on that day, including the name and amount, and then calculate the total calories and proteins intakes for the day according to the appendix.

If you have any problem in the process of using, please contact the number 010-85231436.

Qian-Mei Sun  
Department of Internal Medicine,  
Beijing Chao-Yang Hospital,  
Capital Medical University, Beijing, China  
September, 2017

NAME \_\_\_\_\_

DATE \_\_\_\_\_

|                                | <b>Foods</b> | <b>Amount<br/>(g)</b> | <b>Edible part<br/>(g)</b> | <b>Calories<br/>(kcal)</b> | <b>Proteins<br/>(g)</b> |
|--------------------------------|--------------|-----------------------|----------------------------|----------------------------|-------------------------|
| <b>Breakfast</b>               |              |                       |                            |                            |                         |
| <b>Additional<br/>intake 1</b> |              |                       |                            |                            |                         |
| <b>Lunch</b>                   |              |                       |                            |                            |                         |
| <b>Additional<br/>intake 2</b> |              |                       |                            |                            |                         |
| <b>Dinner</b>                  |              |                       |                            |                            |                         |
| <b>Additional<br/>intake 3</b> |              |                       |                            |                            |                         |
| <b>Total</b>                   | -            |                       | -                          |                            |                         |

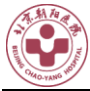

NAME \_\_\_\_\_

DATE \_\_\_\_\_

|                                | <b>Foods</b> | <b>Amount<br/>(g)</b> | <b>Edible part<br/>(g)</b> | <b>Calories<br/>(kcal)</b> | <b>Proteins<br/>(g)</b> |
|--------------------------------|--------------|-----------------------|----------------------------|----------------------------|-------------------------|
| <b>Breakfast</b>               |              |                       |                            |                            |                         |
| <b>Additional<br/>intake 1</b> |              |                       |                            |                            |                         |
| <b>Lunch</b>                   |              |                       |                            |                            |                         |
| <b>Additional<br/>intake 2</b> |              |                       |                            |                            |                         |
| <b>Dinner</b>                  |              |                       |                            |                            |                         |
| <b>Additional<br/>intake 3</b> |              |                       |                            |                            |                         |
| <b>Total</b>                   | -            |                       | -                          |                            |                         |

NAME \_\_\_\_\_

DATE \_\_\_\_\_

|                                | <b>Foods</b> | <b>Amount<br/>(g)</b> | <b>Edible part<br/>(g)</b> | <b>Calories<br/>(kcal)</b> | <b>Proteins<br/>(g)</b> |
|--------------------------------|--------------|-----------------------|----------------------------|----------------------------|-------------------------|
| <b>Breakfast</b>               |              |                       |                            |                            |                         |
| <b>Additional<br/>intake 1</b> |              |                       |                            |                            |                         |
| <b>Lunch</b>                   |              |                       |                            |                            |                         |
| <b>Additional<br/>intake 2</b> |              |                       |                            |                            |                         |
| <b>Dinner</b>                  |              |                       |                            |                            |                         |
| <b>Additional<br/>intake 3</b> |              |                       |                            |                            |                         |
| <b>Total</b>                   | -            |                       | -                          |                            |                         |



NAME \_\_\_\_\_

DATE \_\_\_\_\_

|                                | <b>Foods</b> | <b>Amount<br/>(g)</b> | <b>Edible part<br/>(g)</b> | <b>Calories<br/>(kcal)</b> | <b>Proteins<br/>(g)</b> |
|--------------------------------|--------------|-----------------------|----------------------------|----------------------------|-------------------------|
| <b>Breakfast</b>               |              |                       |                            |                            |                         |
| <b>Additional<br/>intake 1</b> |              |                       |                            |                            |                         |
| <b>Lunch</b>                   |              |                       |                            |                            |                         |
| <b>Additional<br/>intake 2</b> |              |                       |                            |                            |                         |
| <b>Dinner</b>                  |              |                       |                            |                            |                         |
| <b>Additional<br/>intake 3</b> |              |                       |                            |                            |                         |
| <b>Total</b>                   | -            |                       | -                          |                            |                         |

NAME \_\_\_\_\_

DATE \_\_\_\_\_

|                                | <b>Foods</b> | <b>Amount<br/>(g)</b> | <b>Edible part<br/>(g)</b> | <b>Calories<br/>(kcal)</b> | <b>Proteins<br/>(g)</b> |
|--------------------------------|--------------|-----------------------|----------------------------|----------------------------|-------------------------|
| <b>Breakfast</b>               |              |                       |                            |                            |                         |
| <b>Additional<br/>intake 1</b> |              |                       |                            |                            |                         |
| <b>Lunch</b>                   |              |                       |                            |                            |                         |
| <b>Additional<br/>intake 2</b> |              |                       |                            |                            |                         |
| <b>Dinner</b>                  |              |                       |                            |                            |                         |
| <b>Additional<br/>intake 3</b> |              |                       |                            |                            |                         |
| <b>Total</b>                   | -            |                       | -                          |                            |                         |



NAME \_\_\_\_\_

DATE \_\_\_\_\_

|                                | <b>Foods</b> | <b>Amount<br/>(g)</b> | <b>Edible part<br/>(g)</b> | <b>Calories<br/>(kcal)</b> | <b>Proteins<br/>(g)</b> |
|--------------------------------|--------------|-----------------------|----------------------------|----------------------------|-------------------------|
| <b>Breakfast</b>               |              |                       |                            |                            |                         |
| <b>Additional<br/>intake 1</b> |              |                       |                            |                            |                         |
| <b>Lunch</b>                   |              |                       |                            |                            |                         |
| <b>Additional<br/>intake 2</b> |              |                       |                            |                            |                         |
| <b>Dinner</b>                  |              |                       |                            |                            |                         |
| <b>Additional<br/>intake 3</b> |              |                       |                            |                            |                         |
| <b>Total</b>                   | -            |                       | -                          |                            |                         |



NAME \_\_\_\_\_

DATE \_\_\_\_\_

|                                | <b>Foods</b> | <b>Amount<br/>(g)</b> | <b>Edible part<br/>(g)</b> | <b>Calories<br/>(kcal)</b> | <b>Proteins<br/>(g)</b> |
|--------------------------------|--------------|-----------------------|----------------------------|----------------------------|-------------------------|
| <b>Breakfast</b>               |              |                       |                            |                            |                         |
| <b>Additional<br/>intake 1</b> |              |                       |                            |                            |                         |
| <b>Lunch</b>                   |              |                       |                            |                            |                         |
| <b>Additional<br/>intake 2</b> |              |                       |                            |                            |                         |
| <b>Dinner</b>                  |              |                       |                            |                            |                         |
| <b>Additional<br/>intake 3</b> |              |                       |                            |                            |                         |
| <b>Total</b>                   | -            |                       | -                          |                            |                         |



NAME \_\_\_\_\_

DATE \_\_\_\_\_

|                     | Foods | Amount<br>(g) | Edible part<br>(g) | Calories<br>(kcal) | Proteins<br>(g) |
|---------------------|-------|---------------|--------------------|--------------------|-----------------|
| Breakfast           |       |               |                    |                    |                 |
| Additional intake 1 |       |               |                    |                    |                 |
| Lunch               |       |               |                    |                    |                 |
| Additional intake 2 |       |               |                    |                    |                 |
| Dinner              |       |               |                    |                    |                 |
| Additional intake 3 |       |               |                    |                    |                 |
| Total               | -     |               | -                  |                    |                 |

NAME \_\_\_\_\_

DATE \_\_\_\_\_

|                                | <b>Foods</b> | <b>Amount<br/>(g)</b> | <b>Edible part<br/>(g)</b> | <b>Calories<br/>(kcal)</b> | <b>Proteins<br/>(g)</b> |
|--------------------------------|--------------|-----------------------|----------------------------|----------------------------|-------------------------|
| <b>Breakfast</b>               |              |                       |                            |                            |                         |
| <b>Additional<br/>intake 1</b> |              |                       |                            |                            |                         |
| <b>Lunch</b>                   |              |                       |                            |                            |                         |
| <b>Additional<br/>intake 2</b> |              |                       |                            |                            |                         |
| <b>Dinner</b>                  |              |                       |                            |                            |                         |
| <b>Additional<br/>intake 3</b> |              |                       |                            |                            |                         |
| <b>Total</b>                   | -            |                       | -                          |                            |                         |



NAME \_\_\_\_\_

DATE \_\_\_\_\_

|                                | <b>Foods</b> | <b>Amount<br/>(g)</b> | <b>Edible part<br/>(g)</b> | <b>Calories<br/>(kcal)</b> | <b>Proteins<br/>(g)</b> |
|--------------------------------|--------------|-----------------------|----------------------------|----------------------------|-------------------------|
| <b>Breakfast</b>               |              |                       |                            |                            |                         |
| <b>Additional<br/>intake 1</b> |              |                       |                            |                            |                         |
| <b>Lunch</b>                   |              |                       |                            |                            |                         |
| <b>Additional<br/>intake 2</b> |              |                       |                            |                            |                         |
| <b>Dinner</b>                  |              |                       |                            |                            |                         |
| <b>Additional<br/>intake 3</b> |              |                       |                            |                            |                         |
| <b>Total</b>                   | -            |                       | -                          |                            |                         |

NAME \_\_\_\_\_

DATE \_\_\_\_\_

|                                | <b>Foods</b> | <b>Amount<br/>(g)</b> | <b>Edible part<br/>(g)</b> | <b>Calories<br/>(kcal)</b> | <b>Proteins<br/>(g)</b> |
|--------------------------------|--------------|-----------------------|----------------------------|----------------------------|-------------------------|
| <b>Breakfast</b>               |              |                       |                            |                            |                         |
| <b>Additional<br/>intake 1</b> |              |                       |                            |                            |                         |
| <b>Lunch</b>                   |              |                       |                            |                            |                         |
| <b>Additional<br/>intake 2</b> |              |                       |                            |                            |                         |
| <b>Dinner</b>                  |              |                       |                            |                            |                         |
| <b>Additional<br/>intake 3</b> |              |                       |                            |                            |                         |
| <b>Total</b>                   | -            |                       | -                          |                            |                         |



NAME \_\_\_\_\_

DATE \_\_\_\_\_

|                                | <b>Foods</b> | <b>Amount<br/>(g)</b> | <b>Edible part<br/>(g)</b> | <b>Calories<br/>(kcal)</b> | <b>Proteins<br/>(g)</b> |
|--------------------------------|--------------|-----------------------|----------------------------|----------------------------|-------------------------|
| <b>Breakfast</b>               |              |                       |                            |                            |                         |
| <b>Additional<br/>intake 1</b> |              |                       |                            |                            |                         |
| <b>Lunch</b>                   |              |                       |                            |                            |                         |
| <b>Additional<br/>intake 2</b> |              |                       |                            |                            |                         |
| <b>Dinner</b>                  |              |                       |                            |                            |                         |
| <b>Additional<br/>intake 3</b> |              |                       |                            |                            |                         |
| <b>Total</b>                   | -            |                       | -                          |                            |                         |

NAME \_\_\_\_\_

DATE \_\_\_\_\_

|                                | <b>Foods</b> | <b>Amount<br/>(g)</b> | <b>Edible part<br/>(g)</b> | <b>Calories<br/>(kcal)</b> | <b>Proteins<br/>(g)</b> |
|--------------------------------|--------------|-----------------------|----------------------------|----------------------------|-------------------------|
| <b>Breakfast</b>               |              |                       |                            |                            |                         |
| <b>Additional<br/>intake 1</b> |              |                       |                            |                            |                         |
| <b>Lunch</b>                   |              |                       |                            |                            |                         |
| <b>Additional<br/>intake 2</b> |              |                       |                            |                            |                         |
| <b>Dinner</b>                  |              |                       |                            |                            |                         |
| <b>Additional<br/>intake 3</b> |              |                       |                            |                            |                         |
| <b>Total</b>                   | -            |                       | -                          |                            |                         |



NAME \_\_\_\_\_

DATE \_\_\_\_\_

|                                | <b>Foods</b> | <b>Amount<br/>(g)</b> | <b>Edible part<br/>(g)</b> | <b>Calories<br/>(kcal)</b> | <b>Proteins<br/>(g)</b> |
|--------------------------------|--------------|-----------------------|----------------------------|----------------------------|-------------------------|
| <b>Breakfast</b>               |              |                       |                            |                            |                         |
| <b>Additional<br/>intake 1</b> |              |                       |                            |                            |                         |
| <b>Lunch</b>                   |              |                       |                            |                            |                         |
| <b>Additional<br/>intake 2</b> |              |                       |                            |                            |                         |
| <b>Dinner</b>                  |              |                       |                            |                            |                         |
| <b>Additional<br/>intake 3</b> |              |                       |                            |                            |                         |
| <b>Total</b>                   | -            |                       | -                          |                            |                         |



NAME \_\_\_\_\_

DATE \_\_\_\_\_

|                                | <b>Foods</b> | <b>Amount<br/>(g)</b> | <b>Edible part<br/>(g)</b> | <b>Calories<br/>(kcal)</b> | <b>Proteins<br/>(g)</b> |
|--------------------------------|--------------|-----------------------|----------------------------|----------------------------|-------------------------|
| <b>Breakfast</b>               |              |                       |                            |                            |                         |
| <b>Additional<br/>intake 1</b> |              |                       |                            |                            |                         |
| <b>Lunch</b>                   |              |                       |                            |                            |                         |
| <b>Additional<br/>intake 2</b> |              |                       |                            |                            |                         |
| <b>Dinner</b>                  |              |                       |                            |                            |                         |
| <b>Additional<br/>intake 3</b> |              |                       |                            |                            |                         |
| <b>Total</b>                   | -            |                       | -                          |                            |                         |



NAME \_\_\_\_\_

DATE \_\_\_\_\_

|                                | <b>Foods</b> | <b>Amount<br/>(g)</b> | <b>Edible part<br/>(g)</b> | <b>Calories<br/>(kcal)</b> | <b>Proteins<br/>(g)</b> |
|--------------------------------|--------------|-----------------------|----------------------------|----------------------------|-------------------------|
| <b>Breakfast</b>               |              |                       |                            |                            |                         |
| <b>Additional<br/>intake 1</b> |              |                       |                            |                            |                         |
| <b>Lunch</b>                   |              |                       |                            |                            |                         |
| <b>Additional<br/>intake 2</b> |              |                       |                            |                            |                         |
| <b>Dinner</b>                  |              |                       |                            |                            |                         |
| <b>Additional<br/>intake 3</b> |              |                       |                            |                            |                         |
| <b>Total</b>                   | -            |                       | -                          |                            |                         |

NAME \_\_\_\_\_

DATE \_\_\_\_\_

|                                | <b>Foods</b> | <b>Amount<br/>(g)</b> | <b>Edible part<br/>(g)</b> | <b>Calories<br/>(kcal)</b> | <b>Proteins<br/>(g)</b> |
|--------------------------------|--------------|-----------------------|----------------------------|----------------------------|-------------------------|
| <b>Breakfast</b>               |              |                       |                            |                            |                         |
| <b>Additional<br/>intake 1</b> |              |                       |                            |                            |                         |
| <b>Lunch</b>                   |              |                       |                            |                            |                         |
| <b>Additional<br/>intake 2</b> |              |                       |                            |                            |                         |
| <b>Dinner</b>                  |              |                       |                            |                            |                         |
| <b>Additional<br/>intake 3</b> |              |                       |                            |                            |                         |
| <b>Total</b>                   | -            |                       | -                          |                            |                         |



NAME \_\_\_\_\_

DATE \_\_\_\_\_

|                                | <b>Foods</b> | <b>Amount<br/>(g)</b> | <b>Edible part<br/>(g)</b> | <b>Calories<br/>(kcal)</b> | <b>Proteins<br/>(g)</b> |
|--------------------------------|--------------|-----------------------|----------------------------|----------------------------|-------------------------|
| <b>Breakfast</b>               |              |                       |                            |                            |                         |
| <b>Additional<br/>intake 1</b> |              |                       |                            |                            |                         |
| <b>Lunch</b>                   |              |                       |                            |                            |                         |
| <b>Additional<br/>intake 2</b> |              |                       |                            |                            |                         |
| <b>Dinner</b>                  |              |                       |                            |                            |                         |
| <b>Additional<br/>intake 3</b> |              |                       |                            |                            |                         |
| <b>Total</b>                   | -            |                       | -                          |                            |                         |

NAME \_\_\_\_\_

DATE \_\_\_\_\_

|                                | <b>Foods</b> | <b>Amount<br/>(g)</b> | <b>Edible part<br/>(g)</b> | <b>Calories<br/>(kcal)</b> | <b>Proteins<br/>(g)</b> |
|--------------------------------|--------------|-----------------------|----------------------------|----------------------------|-------------------------|
| <b>Breakfast</b>               |              |                       |                            |                            |                         |
| <b>Additional<br/>intake 1</b> |              |                       |                            |                            |                         |
| <b>Lunch</b>                   |              |                       |                            |                            |                         |
| <b>Additional<br/>intake 2</b> |              |                       |                            |                            |                         |
| <b>Dinner</b>                  |              |                       |                            |                            |                         |
| <b>Additional<br/>intake 3</b> |              |                       |                            |                            |                         |
| <b>Total</b>                   | -            |                       | -                          |                            |                         |



NAME \_\_\_\_\_

DATE \_\_\_\_\_

|                                | <b>Foods</b> | <b>Amount<br/>(g)</b> | <b>Edible part<br/>(g)</b> | <b>Calories<br/>(kcal)</b> | <b>Proteins<br/>(g)</b> |
|--------------------------------|--------------|-----------------------|----------------------------|----------------------------|-------------------------|
| <b>Breakfast</b>               |              |                       |                            |                            |                         |
| <b>Additional<br/>intake 1</b> |              |                       |                            |                            |                         |
| <b>Lunch</b>                   |              |                       |                            |                            |                         |
| <b>Additional<br/>intake 2</b> |              |                       |                            |                            |                         |
| <b>Dinner</b>                  |              |                       |                            |                            |                         |
| <b>Additional<br/>intake 3</b> |              |                       |                            |                            |                         |
| <b>Total</b>                   | -            |                       | -                          |                            |                         |

NAME \_\_\_\_\_

DATE \_\_\_\_\_

|                                | <b>Foods</b> | <b>Amount<br/>(g)</b> | <b>Edible part<br/>(g)</b> | <b>Calories<br/>(kcal)</b> | <b>Proteins<br/>(g)</b> |
|--------------------------------|--------------|-----------------------|----------------------------|----------------------------|-------------------------|
| <b>Breakfast</b>               |              |                       |                            |                            |                         |
| <b>Additional<br/>intake 1</b> |              |                       |                            |                            |                         |
| <b>Lunch</b>                   |              |                       |                            |                            |                         |
| <b>Additional<br/>intake 2</b> |              |                       |                            |                            |                         |
| <b>Dinner</b>                  |              |                       |                            |                            |                         |
| <b>Additional<br/>intake 3</b> |              |                       |                            |                            |                         |
| <b>Total</b>                   | -            |                       | -                          |                            |                         |



NAME \_\_\_\_\_

DATE \_\_\_\_\_

|                                | <b>Foods</b> | <b>Amount<br/>(g)</b> | <b>Edible part<br/>(g)</b> | <b>Calories<br/>(kcal)</b> | <b>Proteins<br/>(g)</b> |
|--------------------------------|--------------|-----------------------|----------------------------|----------------------------|-------------------------|
| <b>Breakfast</b>               |              |                       |                            |                            |                         |
| <b>Additional<br/>intake 1</b> |              |                       |                            |                            |                         |
| <b>Lunch</b>                   |              |                       |                            |                            |                         |
| <b>Additional<br/>intake 2</b> |              |                       |                            |                            |                         |
| <b>Dinner</b>                  |              |                       |                            |                            |                         |
| <b>Additional<br/>intake 3</b> |              |                       |                            |                            |                         |
| <b>Total</b>                   | -            |                       | -                          |                            |                         |



NAME \_\_\_\_\_

DATE \_\_\_\_\_

|                                | <b>Foods</b> | <b>Amount<br/>(g)</b> | <b>Edible part<br/>(g)</b> | <b>Calories<br/>(kcal)</b> | <b>Proteins<br/>(g)</b> |
|--------------------------------|--------------|-----------------------|----------------------------|----------------------------|-------------------------|
| <b>Breakfast</b>               |              |                       |                            |                            |                         |
| <b>Additional<br/>intake 1</b> |              |                       |                            |                            |                         |
| <b>Lunch</b>                   |              |                       |                            |                            |                         |
| <b>Additional<br/>intake 2</b> |              |                       |                            |                            |                         |
| <b>Dinner</b>                  |              |                       |                            |                            |                         |
| <b>Additional<br/>intake 3</b> |              |                       |                            |                            |                         |
| <b>Total</b>                   | -            |                       | -                          |                            |                         |



NAME \_\_\_\_\_

DATE \_\_\_\_\_

|                                | <b>Foods</b> | <b>Amount<br/>(g)</b> | <b>Edible part<br/>(g)</b> | <b>Calories<br/>(kcal)</b> | <b>Proteins<br/>(g)</b> |
|--------------------------------|--------------|-----------------------|----------------------------|----------------------------|-------------------------|
| <b>Breakfast</b>               |              |                       |                            |                            |                         |
| <b>Additional<br/>intake 1</b> |              |                       |                            |                            |                         |
| <b>Lunch</b>                   |              |                       |                            |                            |                         |
| <b>Additional<br/>intake 2</b> |              |                       |                            |                            |                         |
| <b>Dinner</b>                  |              |                       |                            |                            |                         |
| <b>Additional<br/>intake 3</b> |              |                       |                            |                            |                         |
| <b>Total</b>                   | -            |                       | -                          |                            |                         |

NAME \_\_\_\_\_

DATE \_\_\_\_\_

|                                | <b>Foods</b> | <b>Amount<br/>(g)</b> | <b>Edible part<br/>(g)</b> | <b>Calories<br/>(kcal)</b> | <b>Proteins<br/>(g)</b> |
|--------------------------------|--------------|-----------------------|----------------------------|----------------------------|-------------------------|
| <b>Breakfast</b>               |              |                       |                            |                            |                         |
| <b>Additional<br/>intake 1</b> |              |                       |                            |                            |                         |
| <b>Lunch</b>                   |              |                       |                            |                            |                         |
| <b>Additional<br/>intake 2</b> |              |                       |                            |                            |                         |
| <b>Dinner</b>                  |              |                       |                            |                            |                         |
| <b>Additional<br/>intake 3</b> |              |                       |                            |                            |                         |
| <b>Total</b>                   | -            |                       | -                          |                            |                         |



NAME \_\_\_\_\_

DATE \_\_\_\_\_

|                                | <b>Foods</b> | <b>Amount<br/>(g)</b> | <b>Edible part<br/>(g)</b> | <b>Calories<br/>(kcal)</b> | <b>Proteins<br/>(g)</b> |
|--------------------------------|--------------|-----------------------|----------------------------|----------------------------|-------------------------|
| <b>Breakfast</b>               |              |                       |                            |                            |                         |
| <b>Additional<br/>intake 1</b> |              |                       |                            |                            |                         |
| <b>Lunch</b>                   |              |                       |                            |                            |                         |
| <b>Additional<br/>intake 2</b> |              |                       |                            |                            |                         |
| <b>Dinner</b>                  |              |                       |                            |                            |                         |
| <b>Additional<br/>intake 3</b> |              |                       |                            |                            |                         |
| <b>Total</b>                   | -            |                       | -                          |                            |                         |

NAME \_\_\_\_\_

DATE \_\_\_\_\_

|                                | <b>Foods</b> | <b>Amount<br/>(g)</b> | <b>Edible part<br/>(g)</b> | <b>Calories<br/>(kcal)</b> | <b>Proteins<br/>(g)</b> |
|--------------------------------|--------------|-----------------------|----------------------------|----------------------------|-------------------------|
| <b>Breakfast</b>               |              |                       |                            |                            |                         |
| <b>Additional<br/>intake 1</b> |              |                       |                            |                            |                         |
| <b>Lunch</b>                   |              |                       |                            |                            |                         |
| <b>Additional<br/>intake 2</b> |              |                       |                            |                            |                         |
| <b>Dinner</b>                  |              |                       |                            |                            |                         |
| <b>Additional<br/>intake 3</b> |              |                       |                            |                            |                         |
| <b>Total</b>                   | -            |                       | -                          |                            |                         |



NAME \_\_\_\_\_

DATE \_\_\_\_\_

|                                | <b>Foods</b> | <b>Amount<br/>(g)</b> | <b>Edible part<br/>(g)</b> | <b>Calories<br/>(kcal)</b> | <b>Proteins<br/>(g)</b> |
|--------------------------------|--------------|-----------------------|----------------------------|----------------------------|-------------------------|
| <b>Breakfast</b>               |              |                       |                            |                            |                         |
| <b>Additional<br/>intake 1</b> |              |                       |                            |                            |                         |
| <b>Lunch</b>                   |              |                       |                            |                            |                         |
| <b>Additional<br/>intake 2</b> |              |                       |                            |                            |                         |
| <b>Dinner</b>                  |              |                       |                            |                            |                         |
| <b>Additional<br/>intake 3</b> |              |                       |                            |                            |                         |
| <b>Total</b>                   | -            |                       | -                          |                            |                         |

NAME \_\_\_\_\_

DATE \_\_\_\_\_

|                                | <b>Foods</b> | <b>Amount<br/>(g)</b> | <b>Edible part<br/>(g)</b> | <b>Calories<br/>(kcal)</b> | <b>Proteins<br/>(g)</b> |
|--------------------------------|--------------|-----------------------|----------------------------|----------------------------|-------------------------|
| <b>Breakfast</b>               |              |                       |                            |                            |                         |
| <b>Additional<br/>intake 1</b> |              |                       |                            |                            |                         |
| <b>Lunch</b>                   |              |                       |                            |                            |                         |
| <b>Additional<br/>intake 2</b> |              |                       |                            |                            |                         |
| <b>Dinner</b>                  |              |                       |                            |                            |                         |
| <b>Additional<br/>intake 3</b> |              |                       |                            |                            |                         |
| <b>Total</b>                   | -            |                       | -                          |                            |                         |



NAME \_\_\_\_\_

DATE \_\_\_\_\_

|                                | <b>Foods</b> | <b>Amount<br/>(g)</b> | <b>Edible part<br/>(g)</b> | <b>Calories<br/>(kcal)</b> | <b>Proteins<br/>(g)</b> |
|--------------------------------|--------------|-----------------------|----------------------------|----------------------------|-------------------------|
| <b>Breakfast</b>               |              |                       |                            |                            |                         |
| <b>Additional<br/>intake 1</b> |              |                       |                            |                            |                         |
| <b>Lunch</b>                   |              |                       |                            |                            |                         |
| <b>Additional<br/>intake 2</b> |              |                       |                            |                            |                         |
| <b>Dinner</b>                  |              |                       |                            |                            |                         |
| <b>Additional<br/>intake 3</b> |              |                       |                            |                            |                         |
| <b>Total</b>                   | -            |                       | -                          |                            |                         |



## APPENDIX

| Food name        | Amount<br>(g) | Edible part<br>(g) | Calories<br>(kcal) | Proteins<br>(g) | Fat<br>(g) | Dietary fiber<br>(g) | Carbohydrate<br>(g) |
|------------------|---------------|--------------------|--------------------|-----------------|------------|----------------------|---------------------|
| Rice             | 100           | 100                | 345                | 7.7             | 0.6        | 0.6                  | 77.4                |
| Glutinous rice   | 100           | 100                | 344                | 7.9             | 0.8        | 0.7                  | 76.7                |
| Wheat            | 100           | 100                | 339                | 11.9            | -          | 10.8                 | 75.2                |
| Wheatmeal        | 100           | 100                | 349                | 11.2            | 1.5        | 2.1                  | 73.6                |
| Noodles          | 100           | 100                | 348                | 10.1            | 0.7        | 1.6                  | 76.0                |
| Buckwheat        | 100           | 100                | 337                | 9.3             | 2.3        | 6.5                  | 73.0                |
| Barley           | 100           | 100                | 327                | 10.2            | 1.4        | 9.9                  | 73.3                |
| Millet           | 100           | 100                | 361                | 9.0             | 3.1        | 1.6                  | 75.1                |
| Corn             | 100           | 100                | 348                | 8.7             | 3.8        | 6.4                  | 73.0                |
| Corn meal        | 100           | 100                | 352                | 8.1             | 3.3        | 5.6                  | 75.2                |
| Oats             | 100           | 100                | 367                | 15.0            | 6.7        | 5.3                  | 61.6                |
| Instant noodles  | 100           | 100                | 472                | 9.5             | 21.1       | 0.7                  | 60.9                |
| Bread            | 100           | 100                | 313                | 8.3             | 5.1        | 0.5                  | 58.6                |
| Sweet potato     | 100           | 100                | 61                 | 0.7             | 0.2        | 0.6                  | 15.3                |
| Potato           | 100           | 100                | 81                 | 2.6             | 0.2        | 1.1                  | 17.8                |
| Stuffed bun      | 100           | 100                | 227                | 7.3             | 10.0       | 1.70                 | 30.3                |
| Dumplings        | 100           | 100                | 218                | 7.5             | 10.8       | 3.2                  | 26.0                |
| Rice cake        | 100           | 100                | 156                | 3.3             | 0.6        | 0.8                  | 34.7                |
| Fried rice       | 100           | 100                | 188                | 5.0             | 5.6        | 2.0                  | 31.7                |
| Milk             | 100           | 100                | 54                 | 3.0             | 3.2        | -                    | 3.4                 |
| Yogurt           | 100           | 100                | 72                 | 2.5             | 2.7        | -                    | 9.3                 |
| Sandwich         | 100           | 100                | 244                | 14.2            | 10.6       | 1.0                  | 22.9                |
| Milk powder      | 100           | 100                | 478                | 20.1            | 21.2       | -                    | 51.7                |
| Cheese           | 100           | 100                | 328                | 25.7            | 23.5       | -                    | 3.5                 |
| Cabbage          | 100           | 82                 | 26                 | 2.1             | 0.2        | 1.2                  | 4.6                 |
| Chinese cabbage  | 100           | 83                 | 17                 | 1.4             | 0.1        | 0.9                  | 3.0                 |
| Green vegetables | 100           | 87                 | 25                 | 1.8             | 0.5        | 1.1                  | 3.8                 |
| Celery           | 100           | 66                 | 17                 | 0.8             | 0.1        | 1.4                  | 3.9                 |
| Leek             | 100           | 90                 | 29                 | 2.4             | 0.4        | 1.4                  | 4.6                 |
| Asparagus        | 100           | 90                 | 22                 | 1.4             | 0.1        | 1.9                  | 4.9                 |



| Food name            | Amount<br>(g) | Edible part<br>(g) | Calories<br>(kcal) | Proteins<br>(g) | Fat<br>(g) | Dietary fiber<br>(g) | Carbohydrate<br>(g) |
|----------------------|---------------|--------------------|--------------------|-----------------|------------|----------------------|---------------------|
| Lettuce              | 100           | 62                 | 15                 | 1.0             | 0.1        | 0.6                  | 2.8                 |
| Garlic               | 100           | 85                 | 128                | 4.5             | 0.2        | 1.1                  | 27.6                |
| Water bamboo         | 100           | 76                 | 26                 | 1.2             | 0.2        | 1.9                  | 5.9                 |
| Carrot               | 100           | 96                 | 39                 | 1.0             | 0.2        | 1.1                  | 8.8                 |
| Water chestnut       | 100           | 78                 | 61                 | 1.2             | 0.2        | 1.1                  | 14.2                |
| Ginger               | 100           | 95                 | 46                 | 1.3             | 0.6        | 2.7                  | 10.3                |
| Radish               | 100           | 95                 | 23                 | 0.9             | 0.1        | 1.0                  | 5.0                 |
| Potato               | 100           | 94                 | 77                 | 2.0             | 0.2        | 0.7                  | 17.2                |
| Lotus root           | 100           | 88                 | 73                 | 1.9             | 0.2        | 1.2                  | 1.0                 |
| Apple                | 100           | 76                 | 54                 | 0.2             | 0.2        | 1.2                  | 13.5                |
| Grapes               | 100           | 86                 | 44                 | 0.5             | 0.2        | 0.4                  | 10.3                |
| Banana               | 100           | 59                 | 93                 | 1.4             | 0.2        | 1.2                  | 22.0                |
| Strawberry           | 100           | 97                 | 32                 | 1.0             | 0.2        | 1.1                  | 7.1                 |
| Longan               | 100           | 50                 | 71                 | 1.2             | 0.1        | 0.4                  | 16.6                |
| Crabapple            | 100           | 100                | 251                | 4.3             | 2.2        | 49.7                 | 78.4                |
| Pear                 | 100           | 82                 | 45                 | 0.2             | 0.2        | 1.1                  | 11.1                |
| Loquat               | 100           | 62                 | 41                 | 0.8             | 0.2        | 0.8                  | 9.3                 |
| Pineapple            | 100           | 68                 | 44                 | 0.5             | 0.1        | 1.3                  | 10.8                |
| Fresh jujube         | 100           | 87                 | 125                | 0.3             | 1.1        | 1.9                  | 30.5                |
| Persimmon            | 100           | 87                 | 74                 | 0.4             | 0.1        | 1.4                  | 18.5                |
| Peach                | 100           | 86                 | 51                 | 0.9             | 0.1        | 1.3                  | 12.2                |
| Apricot              | 100           | 91                 | 38                 | 0.9             | 0.1        | 1.3                  | 9.1                 |
| Orange               | 100           | 76                 | 45                 | 0.8             | 0.4        | 1.4                  | 10.3                |
| Pork (thin)          | 100           | 100                | 143                | 20.3            | 6.2        | -                    | 1.5                 |
| Lamb (thin)          | 100           | 90                 | 118                | 20.5            | 3.9        | -                    | 0.2                 |
| Beef (thin)          | 100           | 100                | 106                | 20.2            | 2.3        | -                    | 1.2                 |
| Spiced beef          | 100           | 100                | 246                | 31.4            | 11.9       | -                    | 3.2                 |
| Chicken              | 100           | 66                 | 167                | 19.3            | 9.4        | -                    | 1.3                 |
| Goose                | 100           | 63                 | 251                | 17.9            | 19.9       | -                    | -                   |
| Pigeon               | 100           | 42                 | 201                | 16.5            | 14.2       | -                    | 1.7                 |
| Duck                 | 100           | 68                 | 240                | 15.5            | 19.7       | -                    | 0.2                 |
| Roast Duck           | 100           | 80                 | 436                | 16.6            | 38.4       | -                    | 6.0                 |
| Pseudosciaena crocea | 100           | 66                 | 97                 | 17.7            | 2.5        | -                    | 0.8                 |
| Little croaker       | 100           | 63                 | 99                 | 17.9            | 3.0        | -                    | 0.1                 |
| Hairtail             | 100           | 76                 | 127                | 17.7            | 4.9        | -                    | 3.1                 |
| Chub                 | 100           | 61                 | 104                | 17.8            | 3.6        | -                    | -                   |
| Carp                 | 100           | 54                 | 109                | 17.6            | 4.1        | -                    | 0.5                 |

| Food name       | Amount<br>(g) | Edible part<br>(g) | Calories<br>(kcal) | Proteins<br>(g) | Fat<br>(g) | Dietary fiber<br>(g) | Carbohydrate<br>(g) |
|-----------------|---------------|--------------------|--------------------|-----------------|------------|----------------------|---------------------|
| Eel             | 100           | 67                 | 89                 | 18.0            | 1.4        | -                    | 1.2                 |
| Grass carp      | 100           | 58                 | 113                | 16.6            | 5.2        | -                    | -                   |
| Loach           | 100           | 60                 | 96                 | 17.9            | 2.0        | -                    | 1.7                 |
| Cuttlefish      | 100           | 69                 | 83                 | 15.2            | 0.9        | -                    | 3.4                 |
| Prawn           | 100           | 61                 | 93                 | 18.6            | 0.8        | -                    | 2.8                 |
| Shrimp          | 100           | 86                 | 87                 | 16.4            | 2.4        | -                    | -                   |
| Crab            | 100           | 42                 | 103                | 17.5            | 2.6        | -                    | 2.3                 |
| Egg             | 100           | 88                 | 156                | 12.8            | 11.1       | -                    | 1.3                 |
| Duck's egg      | 100           | 87                 | 180                | 12.6            | 13.0       | -                    | 3.1                 |
| Goose's egg     | 100           | 87                 | 196                | 11.1            | 15.6       | -                    | 2.8                 |
| Quail egg       | 100           | 86                 | 160                | 12.8            | 11.1       | -                    | 2.1                 |
| Juglans regia   | 100           | 43                 | 646                | 14.9            | 58.8       | 9.5                  | 19.1                |
| Peanut          | 100           | 100                | 574                | 24.8            | 44.3       | 5.5                  | 21.7                |
| Lotus seed      | 100           | 100                | 350                | 17.2            | 2.0        | 3.0                  | 67.2                |
| Pecan           | 100           | 24                 | 616                | 18.0            | 50.4       | 7.4                  | 26.2                |
| Water melonseed | 100           | 43                 | 582                | 32.7            | 44.8       | 4.5                  | 14.2                |

#### Reference:

1. Lan-Fang Ji, etal. Nutrition and Diet [M]. 3<sup>rd</sup>. Beijing: People's Medical Publishing House (PMPH), 2014.
2. Guang-Yu Jiao, etal. Clinical Nutriology[M]. 3<sup>rd</sup>. Beijing: People's Medical Publishing House (PMPH), 2010.

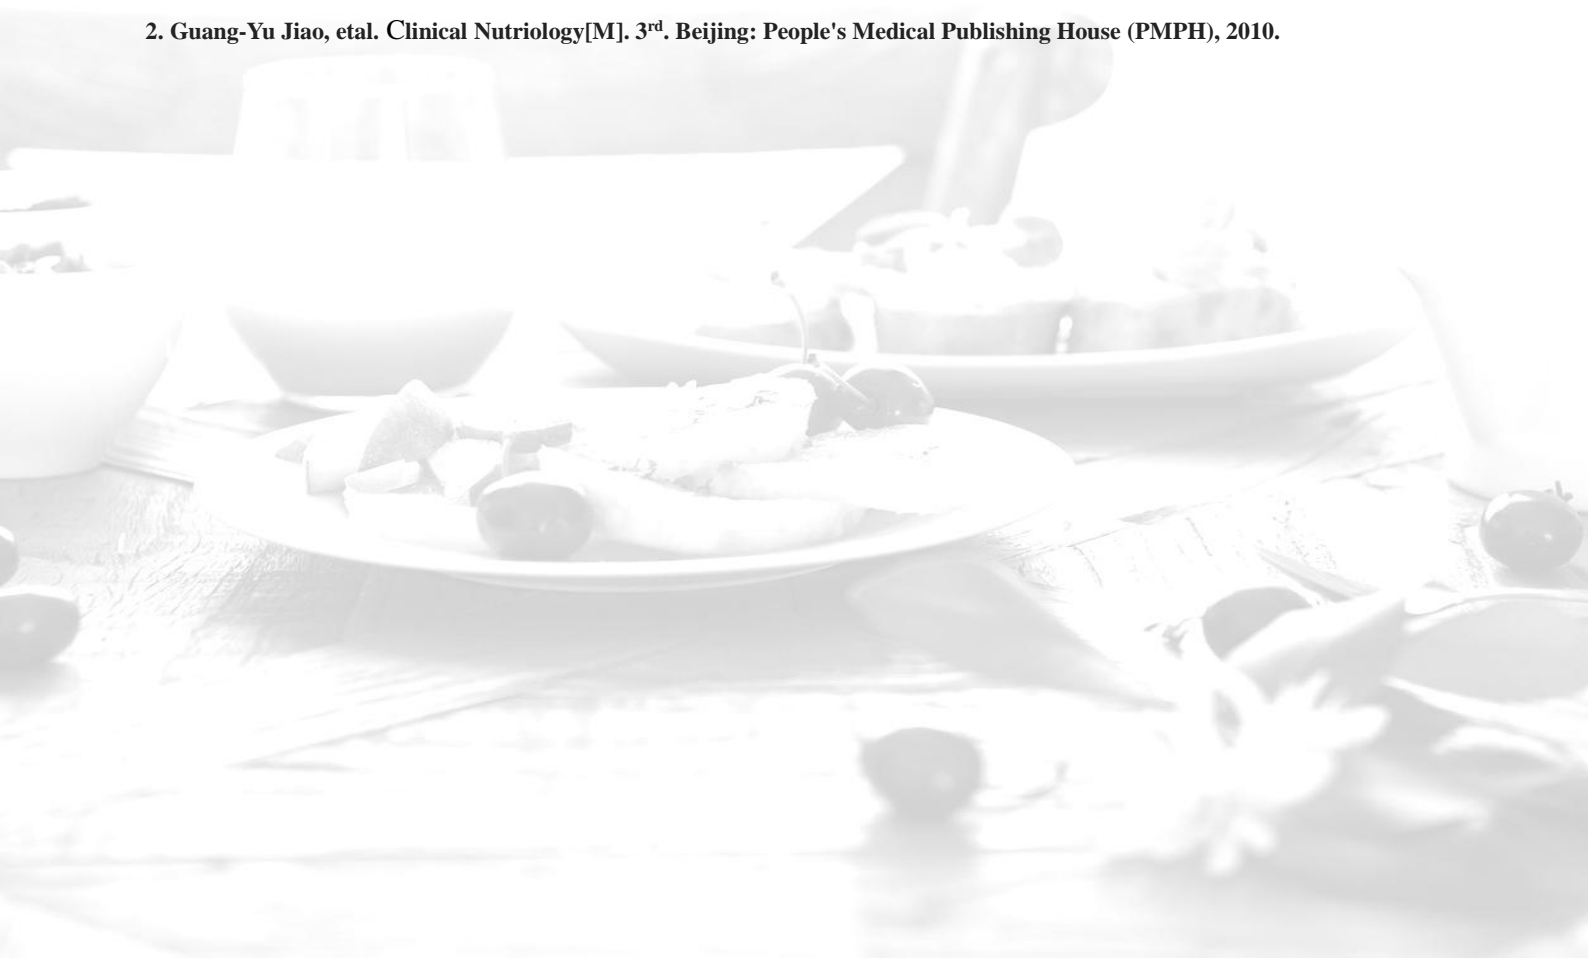

Supplement: MOESM2 [file 17952856]
